1 **Spatiotemporal contribution of neuromesodermal progenitor-derived neural cells in the**  
2 **elongation of developing mouse spinal cord**

3 **Running title: NMPs generate mouse spinal cord.**

4 Mohammed R Shaker<sup>1+</sup>, Ju-Hyun Lee<sup>1</sup>, Kyung Hyun Kim<sup>2,3</sup>, Veronica Jihyun Kim<sup>3</sup>, Joo Yeon  
5 Kim<sup>1</sup>, Ji Yeoun Lee<sup>2,3</sup>, Woong Sun<sup>1\*</sup>

6 <sup>1</sup> Department of Anatomy and Division of Brain, Korea 21 Plus Program for Biomedical  
7 Science, Korea University College of Medicine, 73, Incheon-ro, Seongbuk-gu, Seoul 02841,  
8 Republic of Korea.

9 <sup>2</sup> Division of Pediatric Neurosurgery, Pediatric Clinical Neuroscience Center, Seoul National  
10 University Children's Hospital, Seoul National University College of Medicine, 101 Daehakro,  
11 Jongno-gu, Seoul, 110-769, Republic of Korea.

12 <sup>3</sup> Neural Development and Anomaly Laboratory, Department of Anatomy and Cell Biology,  
13 Seoul National University College of Medicine, 101 Daehakro, Jongno-gu, Seoul, 110-769,  
14 Republic of Korea.

15 <sup>+</sup>Current address: Australian Institute for Bioengineering and Nanotechnology (AIBN), The  
16 University of Queensland, St. Lucia, Brisbane, QLD 4072, Australia.

17

18 **\*Corresponding author:**

19 Woong Sun, PhD

20 Professor, Department of Anatomy

21 Brain Korea 21 Program,

22 Korea University College of Medicine,

23 Seoul, 02841, Korea

24 [woongsun@korea.ac.kr](mailto:woongsun@korea.ac.kr)

25

26

27 **KEY WORDS: Neuromesodermal progenitors, neural tube elongation, mouse, chick,**  
28 **motoneurons, sensory neurons.**

29 **ABSTRACT**

30 During vertebrate development, the posterior end of the embryo progressively elongates in  
31 a head-to-tail direction to form the body plan. Recent lineage tracing experiments revealed that  
32 bi-potent progenitors, called neuromesodermal progenitors (NMPs), produce caudal neural and  
33 mesodermal tissues during axial elongation. However, their precise location and contribution  
34 to spinal cord development remain elusive. Here we used NMP-specific markers (Sox2 and  
35 BraT) and a genetic lineage tracing system to localize NMP progeny *in vivo*. NMPs were  
36 initially located at the tail tip, but were later found in the caudal neural tube, which is a unique  
37 feature of mouse development. In the neural tube, they produced neural stem cells (NSCs) and  
38 contributed to the spinal cord gradually along the AP axis during axial elongation. Interestingly,  
39 NMP-derived NSCs preferentially contributed to the ventral side first and later to the dorsal  
40 side at the lumbar spinal cord level, which may be associated with atypical junctional  
41 neurulation in mice. Our current observations detail the contribution of NMP progeny to spinal  
42 cord elongation and provide insights into how different species uniquely execute caudal  
43 morphogenesis.

44

45

46

47

48

## 49 INTRODUCTION

50 In vertebrates, neuroepithelial cells give rise to the neural tube, which forms through two  
51 processes along the anterior-posterior (AP) axis. The first process is primary neurulation, which  
52 progresses through convergent extension, elevation, bending, and fusion of the neural plate,  
53 forming the rostral neural tube (Pai et al., 2012). By the end of primary neurulation, only the  
54 brain and anterior trunk structures of the spinal cord have formed. As the embryo develops,  
55 progressive addition of new neural stem cells (NSCs) is required at the posterior end of the  
56 spinal neural tube for neural tube elongation. The cells at the dorsal region of the tail bud  
57 aggregate and the tail bud ultimately undergoes cavitation, forming the caudal neural tube; this  
58 comprises the future caudal domain of the spinal cord, which is in continuity with the neural  
59 tube in the trunk derived from the primary neurulation (Schoenwolf, 1984). Defects in this  
60 process, termed “secondary neurulation,” are often associated with spina bifida, a common  
61 congenital malformation in humans (Yang et al., 2014). Secondary neurulation is an embryonic  
62 process contributing to axial neural elongation; thus, here we use the term “neural tube  
63 elongation” instead of “secondary neurulation.” Vertebrates exhibit morphological differences  
64 during neural tube elongation. For instance, chick and human tail bud cells undergo cavitation  
65 to generate the elongating neural tube; eventually, the elongating neural tube adheres to the  
66 primary neural tube at the junctional neurulation zone that is clearly present in the chick and  
67 humans (Dady et al., 2014; Saitsu et al., 2004), but not in mouse (Schoenwolf, 1984). In the  
68 mouse, elongating neural tube cells are polarized via cell rearrangement, and later migrate  
69 toward the lumen of the primary neural tube and fuse, establishing a continuous neural tube  
70 without a junctional zone (Colas and Schoenwolf, 2001). In addition, the chick neural tube  
71 elongation process shapes the spinal cord and extends to the lumbar region (Colas and  
72 Schoenwolf, 2001). A similar anatomical feature is also observed in humans (O’Rahilly and  
73 Müller, 2003; Saitsu et al., 2004), which is contrary to that observed in mice, in which only the  
74 tail is formed by neural tube elongation (Shum et al., 2010).

75 Another important aspect of caudal tube elongation is that the NSCs at this level are  
76 derived from neuromesodermal progenitor cells (NMPs), which are able to produce both neural  
77 and mesodermal tissues (Tsakiridis and Wilson, 2015; Tzouanacou et al., 2009). NMPs are  
78 bipotent progenitor cells that co-express Sox2 and Brachyury T (BraT), which exist in the tail-  
79 bud of human, chick (Olivera-Martinez et al., 2012), and mouse embryos (Anderson et al.,  
80 2013). NMPs persist over extended periods and are eventually depleted toward the end of body  
81 axis elongation (Wymeersch et al., 2016). In addition, fate mapping studies at the tail bud stage

82 using TCreER2 transgenic mice further identified BraT-positive cells located in the floor plate  
83 of the neural tube (Anderson et al., 2013). Collectively, this indicates that anterior and posterior  
84 neural tissues are formed from independent lineages of cells, which challenges the traditional  
85 concept of segregation of the three germ layers (ectoderm, endoderm, and mesoderm) and  
86 subsequent neural fate assignment in ectodermal tissues. While it is well described that NMPs  
87 contribute to spinal cord elongation, quantitative and comprehensive analyses into what extent  
88 NMPs contribute to spinal cord development are currently missing.

89 In this study, we present detailed descriptions of the spatiotemporal localization of  
90 NMPs during the axial elongation periods in the mouse and chick embryos and show that NMPs  
91 localize within mouse neural folding and elongation tissues, whereas chick NMPs only localize  
92 at the tail bud tissue. Furthermore, we mapped the distribution and neuronal differentiation of  
93 NMP-derived NSCs depending on their birthdates using a genetic BraT lineage reporter system.  
94 Our current observations clearly illustrate that NSCs derived from NMPs contribute to the  
95 caudal spinal cord with developmental orders depending on the anteroposterior and  
96 dorsoventral (DV) axes.

97

98

## 99 **RESULTS**

### 100 **Presence of neuromesodermal progenitors in the mouse neural tube**

101 NMPs emerge near the primitive streak and later remain in restricted regions in the tail  
102 bud during axial elongation (Wymeersch et al., 2016). We extended the observation of the  
103 spatiotemporal distribution of NMPs during different stages of axial elongation of neural  
104 tissues, including the early and late stages of neural folding and neural tube elongation. During  
105 an early stage of neural folding (E8), whole-mount immunofluorescence labeling revealed that  
106 NMPs, which are double-labeled with Sox2 and BraT, were abundant within caudal  
107 neuroepithelial sheets before neural folding (Fig. 1A). Furthermore, a population of NMPs was  
108 observed within the neural tissues already forming the neural tube (Fig. 1A), suggesting that at  
109 least one population of Sox2<sup>+</sup> cells undergoing neurulation maintains BraT expression. At a  
110 later stage of neural folding (E10), these double-positive cells were predominantly found within  
111 the neural tube, while tail bud cells prominently expressed only BraT (Fig. 1B). At E11, double-  
112 positive cells were detected in a broad domain of the elongating caudal neural tube, while the

113 expression levels of BraT appeared to be diminished in the tail bud (Fig. 1C), and, by E12,  
114 double-positive cells were no more observed within the neural tube (Fig. 1D). Cross-sectioning  
115 further demonstrated that the neural tube prominently expresses Sox2 only, and that only a few  
116 Sox2- and BraT-expressing cells were restricted to the dorsal caudal tail bud domain (Fig. 1D).  
117 Considering that the embryonic stage E10 marks the end of the neural folding process and the  
118 beginning of neural tube elongation, our data suggest that NMPs are transiently located at the  
119 caudal neural tube, even after depletion of NMPs in the tail bud.

120

### 121 **Absence of neuromesodermal progenitors in the chick neural tube**

122 We described above that double-positive cells, which are potentially NMPs, localize  
123 within the mouse spinal caudal neural tube and contribute to the formation and elongation of  
124 the caudal neural tube. To determine whether a similar NMP distribution is conserved in the  
125 chick, we focused on the events of primary neurulation and neural tube elongation using whole-  
126 mount and cross-section analysis. At Hamburger Hamilton (HH) 9, NMPs were found in the  
127 tail bud and in mesodermal tissues, with absent BraT expression in neural tissues (Fig. 2A). By  
128 HH12, before neural tube elongation starts, NMPs were abundant in the tail bud and ventral  
129 clusters beneath the newly forming neural tube (Fig. 2B). However, newly formed primary  
130 neural tube expressed Sox2 only, while adjacent notochord and mesodermal tissues maintained  
131 BraT expression (Fig. 2B). During chick neural tube elongation, neural cells aggregated at the  
132 dorsal tail bud before arranging into a cord-like mass that was continuous with the primary  
133 neural tube; these events occurred between HH16 and HH45 (Yang et al., 2003). By HH28, we  
134 observed Sox2<sup>+</sup>-cell aggregation at the dorsal tail bud (Fig. 2C). Interestingly, unlike in the  
135 mouse, we did not detect NMPs in the chick elongated neural tube; BraT expression was  
136 restricted to the midline and the ventral domain of the tail bud and notochord of the newly  
137 formed, elongated neural tube and lumbar spinal cord (Fig. 2C), suggesting that NMPs were  
138 depleted from the tail bud during axial elongation.

139 In sum, the mouse and chick display distinct morphogenetic processes during neural  
140 tube elongation. Our data add additional distinct features where mouse NMPs are included in  
141 the elongating neural tube, whereas chick NMPs are restricted to the tail bud and Sox2<sup>+</sup> cells  
142 are likely generated only for primary neurulation (Fig. 2D).

143

## 144 **Lineage tracing of NMP-derived NSCs in spinal cord elongation**

145 Multiple clonal studies and single-cell labeling experiments in the mouse and chick  
146 have demonstrated the contribution of NMP-derived NSCs to the developing neural tube  
147 (Brown and Storey, 2000; Forlani et al., 2003). However, the contribution of NMP-derived  
148 cells to later spinal cord development is less addressed. Thus, we explored the fate of NMP-  
149 derived NSCs by utilizing transgenic TCreERT2 mice crossed with Rosa-EGFP mice to trace  
150 the cells generated from BraT-expressing cells in which Cre recombinase activation is triggered  
151 by Tamoxifen (TAM) injection (Anderson et al., 2013). We first traced NMP progeny before  
152 neural tube closure by injecting TAM at E5, a stage where blastocysts express BraT at the  
153 caudal domain, and gastrulation is being triggered (van den Brink et al., 2014). GFP<sup>+</sup> cells were  
154 expressed throughout the trunk tissues; this expression was maintained during development  
155 (Figure 3A), and a detectable number of GFP<sup>+</sup> cells were observed up to the midbrain and  
156 hindbrain domains (Fig. 3A, magnified image). Accordingly, GFP<sup>+</sup>/Sox2<sup>+</sup> cells were  
157 widespread in the entire spinal cord (Fig. 3B).

158 For detailed analyses, BraT cells were labeled by TAM injection at three different time  
159 points, at E6 (before neurulation), E8 (during neurulation), and E10 (during neural tube  
160 elongation), and the embryos were harvested at E12 (Fig. 3C, D) to assess the contribution of  
161 NMP-derived NSCs ‘born’ at different time points in the embryonic spinal cord. Labeling at  
162 E6 led to the emergence of GFP<sup>+</sup> NSCs from the brachial level (25%), reaching approximately  
163 40% GFP<sup>+</sup> NSCs within the thoracic neural tube and a progressively greater proportion of  
164 NSCs at the caudal parts of the spinal cord (Fig. 3D). On the other hand, tracing of BraT-  
165 expressing cell progenitors at E8 illustrated the blunting of brachial and thoracic cell  
166 populations and first appeared at the lumbar level. Furthermore, cells derived from E10 NMPs  
167 contributed significantly less to lumbar level NSCs, and were more confined to the sacral  
168 regions. Collectively, these data indicate that NMP-derived NSCs appear to be sequentially  
169 added to the caudal part of the spinal cord during axial elongation.

170 During our observations, we noticed that there was also a significant tendency for DV  
171 preference of NMP-derived NSCs depending on their birthdate. This tendency was most  
172 prominent at the lumbar level (Fig. 3E). Labeled NMPs at E8 were preferentially localized to  
173 the ventral domain of the rostral lumbar level, while DV-dependent differences were not  
174 observed at the lumbosacral level (Fig. 3E). Conversely, labeled NCSs derived from NMPs at  
175 E10 were preferentially detected at the dorsal domain of the caudal lumbar neural tube (Fig.

176 3E). Altogether, these data indicate that NSCs derived from the NMPs at the caudal spinal cord  
177 are distributed with AP and DV ordering, as summarized in Fig. 3F.

178

### 179 **The progeny of NMPs generates mature spinal motoneurons and somatic sensory** 180 **neurons**

181 Because we found that NMP-derived NSCs are located at the ventral and dorsal  
182 domains of the spinal neural tube (Fig. 3), we then explored the contributions of these NSCs to  
183 the differentiation of corresponding spinal neurons. First, we quantified the percentage of  
184 Olig2-labeled motoneuron (MN) progenitors descended from NMPs at the lumbar and sacral  
185 levels. MN progenitors derived from NMPs were prominent in lumbar regions, amounting to  
186 approximately 60% of MN progenitors born at E6 and E8 (Fig. 4A, B). Similar data were also  
187 obtained at the sacral level, with approximately 80% of MN progenitors having derived from  
188 NMPs. On the other hand, TAM injection at E10 resulted in an approximate labeling of 20%  
189 of cells. Based on the assumption that lineage labeling gave rise to the above cumulative picture  
190 owing to the labeling of later-stage NMPs as well as NSCs derived at the timepoint of TAM  
191 injection, we estimated the proportion of MN progenitors that descended from NMPs at  
192 different durations of labeling (Fig. 4C). By this estimation, it appeared that 60% of lumbar  
193 MN progenitors and 74.7% of sacral MN progenitors were born during the E8-E10 period,  
194 while 8.5% of lumbar MN progenitors and no sacral MN progenitors were born earlier (during  
195 the E6-E10 period, Fig. 4C). We also found that 24-31% of Olig2<sup>+</sup> MN progenitors were not  
196 labeled by TAM injection at E6, which may have been caused by the contribution of non-NMP-  
197 derived NSCs at these caudal levels, or by the insufficient penetration of our genetic  
198 manipulations. Much lower contributions of E6- and NMP-derived MN progenitors to brachial  
199 and thoracic levels were observed (Fig. S1A, B), which is consistent with the current idea that  
200 NMP-derived NSCs are gradually added to the caudal spinal cord during axial elongation.  
201 Finally, we addressed NMP-derived NSC differentiation. We found that GFP<sup>+</sup> cells were  
202 observed in dorsal neurons with midline-crossing axonal projections, in ventral MNs, and even  
203 in the dorsal root ganglia (DRG) (Fig. 4D). Double labeling with markers for MNs (Isl1/2 or  
204 NeuN; Figure 4E, Fig. S1C), or sensory neurons (Brn3a, Fig. 4F, G) confirmed their identities,  
205 indicating that NMP progeny contributes to the sensory ganglion neurons in the caudal somatic  
206 spinal cord and peripheral nervous system (PNS).

207

## 208 DISCUSSION

209 In this study, we discovered that mouse NMPs localize at the caudal neural tube during  
210 the neural tube elongation period, where they contribute to posterior neurulation and elongation.  
211 On the other hand, chick NMPs were restricted to tail-bud tissue but not to the neural tube. The  
212 differences in NMP distribution patterns closely correlate with distinct features of embryonic  
213 neurulation processes of the mouse and chick. For instance, a junctional neurulation zone is  
214 absent in the mouse due to the continuity of primary neurulation and neural tube elongation,  
215 whereas a chick junctional zone is morphologically present. Using an *in vivo* lineage tracing  
216 approach, we mapped and illustrated the contribution of NMPs to mouse spinal neural tube  
217 formation and found that it gradually increased along the AP axis of the spinal cord, during the  
218 axial elongation of the neural tube. We also discovered a tendency for NMP-derived NSCs to  
219 contribute to the different regions at the lumbar level of the spinal cord, in a DV gradient,  
220 depending on their birthdates. These features are associated with atypical neural tube  
221 elongation in caudal neural tube morphogenesis in mice.

222 Neural folding and neural elongation are different with respect to morphogenetic  
223 processes, and the fundamental aspects of this difference appear to be conserved across species.  
224 The elongation of the neural tube during development progresses craniocaudally, with the  
225 cranial domain developmentally more mature than the caudal domain. Upon fusion of the  
226 elongating neural tube with the primary neural tube, a junctional zone known as junctional  
227 neurulation is formed and is clearly present in many species, including the chick (Dady et al.,  
228 2014). However, other species, such as zebrafish and *Xenopus*, display no junctional  
229 neurulation because the progress of neurulation appears to be continuous with the process of  
230 neural tube elongating (Lowery and Sive, 2004). In the mouse, it has also been proposed that  
231 a junctional neurulation zone is absent (Schoenwolf, 1984). Our observation that NMPs reside  
232 within the caudal neural tube appears to conform to the atypical neural tube elongation and the  
233 absence of junctional zone in mice. NMPs are present in the caudal part of the body and  
234 contribute to axial elongation; it is believed that they are responsible for caudal spinal cord  
235 elongation, through localization at the tail-bud of the chick, mouse, human, and zebrafish  
236 (Martin and Kimelman, 2012; Olivera-Martinez et al., 2012; Tsakiridis et al., 2014). Our  
237 examination of the spatiotemporal distribution of NMPs at the later developmental phases  
238 identified Sox2 and BraT double-positive cells in the mouse caudal neural tube at E10-E11,  
239 but with only marginal occurrence in the tail bud. Thus, it appeared that these NMPs within the  
240 neural tube differentiated into definite NSCs with the loss of BraT expression. Recently, it was



241 reported that chick caudal NMPs are spatially and functionally segregated, depending on the  
242 ability to produce neural vs. mesodermal cells and the placement of neural-lineage restricted  
243 cells at the anterior domain (Kawachi et al., 2020). Collectively, although the location of NMPs  
244 and detailed caudal morphogenesis are different in the mouse and chick, the fundamental  
245 molecular programs for caudal neural tube elongation appear to be conserved between species.

246 It has previously been reported that cells originated from NMPs are detected within the  
247 primary neural tube regions (Gouti et al., 2014; Henrique et al., 2015). Accordingly, *in vitro*  
248 differentiation of NMP for 8 days upon activation by retinoic acid led to an increase in the MN  
249 progenitor marker Olig2, with posterior identity determined by Hox gene expression.  
250 Differentiating cells further adopted neuronal morphology and expressed Tuj1 (Gouti et al.,  
251 2014). In addition, 14 days of NMP differentiation under conditioned media favoring the  
252 generation of sympathetic neurons generated peripheral neuron-specific intermediate filaments,  
253 which express tyrosine hydroxylase, dopamine beta hydroxylase, and peripherin in over 85%  
254 of cells (Kirino et al., 2018). In order to study the lineage of NMPs during axial elongation,  
255 studies involving dye labeling and cell grafting have been conducted (Kawachi et al., 2020;  
256 Martin and Kimelman, 2012). However, these approaches are often imprecise due to the close  
257 proximity between various cell types producing various cell mixtures during development of  
258 the embryo. To overcome this limitation, we took advantage of TCreERT2 and crossed the  
259 strain with a Rosa-EGFP reporter mouse to trace all lineages of BraT<sup>+</sup> cells emerging from tail-  
260 bud tissue (Anderson et al., 2013). We found that an increasing proportion of spinal cord  
261 domains in the anteroposterior axis are derived from NMPs, suggesting a co-contribution of  
262 NMPs and neuroectodermal progeny in building-up the neural tube. We also determined that  
263 NSCs derived from NMPs generate ventral domains first and dorsal domains later in the lumbar  
264 neural tube. This is consistent with previous studies which adopted clonal and homotopic graft  
265 experiments during early phases of spinal cord development and observed that the majority of  
266 early-produced NSCs were restricted to the ventral half of the neural tube (Cambray and  
267 Wilson, 2007; Forlani et al., 2003). The DV positions of these clusters are fixed and conserved  
268 among animals (Hollyday and Jacobson, 1990). Accordingly, we found that these NMP-  
269 derived NSCs properly produced mature neurons populating the spinal cord. We also found  
270 that NMP-derived NSCs contributed to sensory neurons in the DRG, which are generated by  
271 border cell-derived neural crest cells (Kasemeier-Kulesa et al., 2005). This is consistent with a  
272 recent study demonstrating the production of DRG cells from human pluripotent stem cells

273 (hPSCs) via induction of NMPs (Frith et al., 2018), indicating that NMPs exhibit a potential to  
274 produce neural lineage cells which contribute to the CNS and PNS.

275           Despite the significant insights gleaned about the *in vivo* neurobiological patterns of  
276 NMPs and their progeny, there remains a surprisingly large gap of knowledge. In-depth *in vivo*  
277 studies and cell differentiation experiments in NMP culture *in vitro* based on our current  
278 observations will be complementary methods to address how caudal neural tissues are  
279 produced and organized in detail.

280

281

282

283

## 284 MATERIALS AND METHODS

285

### 286 Animals and embryos

287 For transgenic mice, the TCreER2 transgenic mouse line used in this work has been  
288 described previously (Anderson et al., 2013). TCreER2 transgenic and Rosa-EGFP reporter  
289 mice were purchased from Jackson ImmunoResearch Laboratories. TCreER males were  
290 crossed with Rosa-EGFP females to generate TcreER2:Rosa-EGFP transgenic males, where  
291 the *Rosa26-LacZ* allele is inserted into the *BraT* promoter. In TcreER2:Rosa-EGFP mice, Bra  
292 T cells express GFP upon recombination after tamoxifen treatment of pregnant females at a  
293 concentration of 0.175 mg/g. Rosa-EGFP females were then back crossed to TcreER2:Rosa-  
294 EGFP males, and females were separated on the following day, at embryonic day 1 (E1).  
295 Tamoxifen was injected into pregnant females at either E5, E6, E8 or E10 to label BraT cells  
296 before and after neural tube closure, respectively. For wild-type mice, pregnant female  
297 C57BL/6 mice at E8, E10, E11, and E12 were purchased from DAEHAN BIOLINL. For chick  
298 embryos, eggs were purchased from a commercial supplier (Pulmuone, South Korea) and  
299 incubated in a turning incubator at 38 °C with relative humidity at 65%. Following incubation,  
300 chick embryos at Hamburger-Hamilton (HH) stages 9, 12, and 28 were harvested. The embryos  
301 were fixed in 4% paraformaldehyde (PFA) solution overnight. All experiments were carried  
302 out in accordance with the ethical guidelines of Korea University and with the approval of the  
303 Animal Care and Use Committee of Korea University (KOREA-2016-0125).

304

### 305 Immunohistochemistry

306 Tissue processing was performed as described in (Lee et al., 2019) and  
307 immunohistochemistry (IHC) was performed as described in (Kim et al., 2017). In brief, tissues  
308 were fixed with 4% PFA in 1x phosphate buffer saline (PBS) overnight at 4 °C, followed by  
309 washing several times with PBS before sectioning. Fixed tissues were then immersed in 30%  
310 sucrose in PBS at 4 °C before being embedded in a solution containing at 3:2 ratio Optimal  
311 Cutting Temperature (O.C.T) and 30% sucrose on dry ice. Embedded tissues were then  
312 sectioned serially to 14- $\mu$ M thickness and collected onto New Silane III-coated slides (Muto  
313 Pure Chemicals Co. Ltd, 5118-20F). For IHC, sectioned samples were washed three times for  
314 10 minutes at room temperature (RT) before blocking for 1 hour with a solution containing 3%

315 bovine serum albumin and 0.1% triton X-100 in PBS. Primary antibodies, including rabbit anti-  
316 Sox2 (1:500; Millipore, AB5603), goat anti-Brachyury T (1:500; R&D systems, AF2085),  
317 chick anti-GFP (1:2000; Abcam, ab13970), mouse anti-Isl1/2 (1:200; DSHB, 39.4D5), rabbit  
318 anti-Olig2 (1:500; IBL, JP18953), mouse anti-NeuN (1:500; Millipore, MAB377), and goat  
319 anti-Brn3a (1:500; Santa Cruz, sc-31984) were added overnight at 4 °C before washing three  
320 times with PBS for 10 minutes each at RT. Tissues were then incubated with respective  
321 secondary antibodies for 1 hour at RT before mounting and imaging. All tissues and cells were  
322 counterstained with Hoechst 33342 from Invitrogen. All images were acquired using confocal  
323 microscopy (Leica TCS SP8).

324

### 325 **Whole-mount immunostaining and 3D imaging**

326 Tissue processing was performed as described in (Lee et al., 2020), and whole-mount IHC  
327 was performed as described in (Shaker et al., 2015). In brief, dissected tissues were fixed in 2%  
328 PFA in PBS for 20 minutes on ice. Fixed embryos were then washed three times for 10 minutes  
329 each on ice. Tissues were then dehydrated in 50% methanol in PBS for 10 minutes and then in  
330 100% methanol, two times for 10 minutes on ice. Tissues were either stored at -20 °C or  
331 rehydrated in PBST before blocking with 10% BSA in PBST overnight at RT. Primary  
332 antibodies (listed above) were diluted in PBST containing 10% BSA and added to blocked  
333 tissue for two days at 4 °C. Tissues were then washed three times with PBST for 20 minutes at  
334 4 °C before incubation with secondary antibodies for two days at 4 °C. Tissues were washed  
335 again with PBST for 20 minutes at 4 °C before mounting and imaging. All steps were  
336 performed using a rocker, with gentle rocking for approximately 15 seconds so as to complete  
337 one full rocking motion. All images were captured with a Leica TCS SP8 confocal microscope.

338

### 339 **Imaging, quantification and analysis**

340 Acquired digital images were prepared in Photoshop with adjustment for color,  
341 magnification, brightness, and contrast applied equally to images under comparison. For  
342 quantitation of cell percentages, total numbers of positive cells were counted manually.  
343 Comparisons of lineage-traced cell fates were presented as percent of each sample/tissue  
344 section, and multiple samples were used to calculate averages and standard deviations, and for  
345 statistical comparisons with one-way ANOVA or unpaired Student's t-test.

346 **Statistical analysis**

347 Statistical analyses were performed using one-way ANOVA or unpaired Student's t-test.  
348 All analyses were carried out using the GraphPad Prism 8 software, and the results were  
349 presented as mean  $\pm$  standard deviation. P-values  $< 0.05$  were considered statistically  
350 significant.

351

352 **Competing interests**

353 The authors declare no competing or financial interests

354

355 **Author contributions**

356 Conceptualization: M.R.S., W.S.; Methodology: M.R.S., J.H.L., K.H.K., V.J.K., J.Y.K., J.Y.L.,  
357 W.S.; Validation: M.R.S., J.Y.L., W.S.; Formal analysis: M.R.S., W.S.; Investigation: M.R.S.,  
358 J.Y.L., W.S.; Resources: J.Y.L., W.S.; Data curation: M.R.S., J.H.L.; Writing - original draft:  
359 M.R.S., W.S.; Writing - review & editing: M.R.S., J.Y.L., W.S.; Visualization: M.R.S.;  
360 Supervision: W.S.; Project administration: W.S.; Funding acquisition: J.Y.L., W.S.

361

362 **Funding**

363 This research was supported by the Brain Research Program through the National Research  
364 Foundation (NRF), which was funded by the Korean Ministry of Science, ICT & Future  
365 Planning (NRF-2012M3A9C6049933, NRF-2015M3C7A1028790, and NRF-  
366 2017M3A9B3061308).

367

## 368 References

- 369 **Anderson, M. J., Naiche, L., Wilson, C. P., Elder, C., Swing, D. A. and Lewandoski, M.** (2013). TCreERT2,  
370 a transgenic mouse line for temporal control of Cre-mediated recombination in lineages  
371 emerging from the primitive streak or tail bud. *PLoS one* **8**, e62479.
- 372 **Brown, J. M. and Storey, K. G. J. C. B.** (2000). A region of the vertebrate neural plate in which  
373 neighbouring cells can adopt neural or epidermal fates. *Current Biology* **10**, 869-872.
- 374 **Cambray, N. and Wilson, V.** (2007). Two distinct sources for a population of maturing axial progenitors.  
375 *Development* **134**, 2829-2840.
- 376 **Colas, J. F. and Schoenwolf, G. C.** (2001). Towards a cellular and molecular understanding of  
377 neurulation. *Developmental dynamics* **221**, 117-145.
- 378 **Dady, A., Havis, E., Esciou, V., Catala, M. and Duband, J.-L.** (2014). Junctional neurulation: a unique  
379 developmental program shaping a discrete region of the spinal cord highly susceptible to  
380 neural tube defects. *The Journal of Neuroscience* **34**, 13208-13221.
- 381 **Forlani, S., Lawson, K. A. and Deschamps, J. J. D.** (2003). Acquisition of Hox codes during gastrulation  
382 and axial elongation in the mouse embryo. *Development* **130**, 3807-3819.
- 383 **Frith, T. J., Granata, I., Wind, M., Stout, E., Thompson, O., Neumann, K., Stavish, D., Heath, P. R.,  
384 Ortmann, D. and Hackland, J. O.** (2018). Human axial progenitors generate trunk neural crest  
385 cells in vitro. *Elife* **7**, e35786.
- 386 **Gouti, M., Tsakiridis, A., Wymeersch, F. J., Huang, Y., Kleinjung, J., Wilson, V. and Briscoe, J.** (2014).  
387 In vitro generation of neuromesodermal progenitors reveals distinct roles for wnt signalling in  
388 the specification of spinal cord and paraxial mesoderm identity. *PLoS Biol* **12**, e1001937.
- 389 **Henrique, D., Abranches, E., Verrier, L. and Storey, K. G.** (2015). Neuromesodermal progenitors and  
390 the making of the spinal cord. *Development* **142**, 2864-2875.
- 391 **Hollyday, M. and Jacobson, R. D.** (1990). Location of motor pools innervating chick wing. *Journal of*  
392 *comparative neurology* **302**, 575-588.
- 393 **Kasemeier-Kulesa, J. C., Kulesa, P. M. and Lefcort, F. J. D.** (2005). Imaging neural crest cell dynamics  
394 during formation of dorsal root ganglia and sympathetic ganglia. *Development* **132**, 235-245.
- 395 **Kawachi, T., Shimokita, E., Kudo, R., Tadokoro, R. and Takahashi, Y.** (2020). Neural-fated self-  
396 renewing cells regulated by Sox2 during secondary neurulation in chicken tail bud.  
397 *Developmental biology* **461**, 160-171.
- 398 **Kim, J. Y., Shaker, M. R., Lee, J.-H., Lee, B., Kim, H. and Sun, W.** (2017). Identification of molecular  
399 markers distinguishing adult neural stem cells in the subventricular and subcallosal zones.  
400 *Animal Cells and Systems* **21**, 152-159.
- 401 **Kirino, K., Nakahata, T., Taguchi, T. and Saito, M. K. J. S. r.** (2018). Efficient derivation of sympathetic  
402 neurons from human pluripotent stem cells with a defined condition. *Scientific reports* **8**, 1-  
403 11.
- 404 **Lee, E., Kim, H. J., Shaker, M. R., Ryu, J. R., Ham, M. S., Seo, S. H., Kim, D. H., Lee, K., Jung, N., Choe,  
405 Y., et al.** (2019). High-performance acellular tissue scaffold combined with hydrogel polymers  
406 for regenerative medicine. *ACS Biomaterials Science Engineering* **5**, 3462-3474.
- 407 **Lee, J.-H., Shaker, M. R., Lee, E., Lee, B. and Sun, W. J. S. C. R.** (2020). NeuroCore Formation During  
408 Differentiation of Neurospheres of Mouse Embryonic Neural Stem Cells. *Stem cell research* **34**,  
409 101691.
- 410 **Lowery, L. A. and Sive, H.** (2004). Strategies of vertebrate neurulation and a re-evaluation of teleost  
411 neural tube formation. *Mechanisms of development* **121**, 1189-1197.
- 412 **Martin, B. L. and Kimelman, D.** (2012). Canonical Wnt signaling dynamically controls multiple stem  
413 cell fate decisions during vertebrate body formation. *Developmental cell* **22**, 223-232.
- 414 **O'Rahilly, R. and Müller, F.** (2003). Somites, spinal ganglia, and centra. *Cells Tissues Organs* **173**, 75-  
415 92.

- 416 **Olivera-Martinez, I., Harada, H., Halley, P. A. and Storey, K. G.** (2012). Loss of FGF-dependent  
417 mesoderm identity and rise of endogenous retinoid signalling determine cessation of body  
418 axis elongation. *PLoS Biology* **10**, e1001415.
- 419 **Pai, Y. J., Abdullah, N., Mohammed, R., Rolo, A., Greene, N. D., Abdul-Aziz, N. M. and Copp, A. J.**  
420 (2012). Epithelial fusion during neural tube morphogenesis. *Birth Defects Research Part A:*  
421 *Clinical and Molecular Teratology* **94**, 817-823.
- 422 **Saito, H., Yamada, S., Uwabe, C., Ishibashi, M. and Shiota, K.** (2004). Development of the posterior  
423 neural tube in human embryos. *Anatomy and embryology* **209**, 107-117.
- 424 **Schoenwolf, G. C.** (1984). Histological and ultrastructural studies of secondary neurulation in mouse  
425 embryos. *American journal of anatomy* **169**, 361-376.
- 426 **Shum, A. S., Tang, L. S., Copp, A. J. and Roelink, H.** (2010). Lack of motor neuron differentiation is an  
427 intrinsic property of the mouse secondary neural tube. *Developmental Dynamics* **239**, 3192-  
428 3203.
- 429 **Tsakiridis, A., Huang, Y., Blin, G., Skylaki, S., Wymeersch, F., Osorno, R., Economou, C., Karagianni,  
430 E., Zhao, S. and Lowell, S.** (2014). Distinct Wnt-driven primitive streak-like populations reflect  
431 in vivo lineage precursors. *Development* **141**, 1209-1221.
- 432 **Tsakiridis, A. and Wilson, V.** (2015). Assessing the bipotency of in vitro-derived neuromesodermal  
433 progenitors. *F1000Research* **4**, 1-18.
- 434 **Tzouanacou, E., Wegener, A., Wymeersch, F. J., Wilson, V. and Nicolas, J.-F.** (2009). Redefining the  
435 progression of lineage segregations during mammalian embryogenesis by clonal analysis.  
436 *Developmental cell* **17**, 365-376.
- 437 **van den Brink, S. C., Baillie-Johnson, P., Balayo, T., Hadjantonakis, A.-K., Nowotschin, S., Turner, D.  
438 A. and Arias, A. M.** (2014). Symmetry breaking, germ layer specification and axial organisation  
439 in aggregates of mouse embryonic stem cells. *Development* **141**, 4231-4242.
- 440 **Wymeersch, F. J., Huang, Y., Blin, G., Cambray, N., Wilkie, R., Wong, F. C. and Wilson, V.** (2016).  
441 Position-dependent plasticity of distinct progenitor types in the primitive streak. *Elife* **5**,  
442 e10042.
- 443 **Yang, H.-J., Lee, D.-H., Lee, Y.-J., Chi, J. G., Lee, J. Y., Phi, J. H., Kim, S.-K., Cho, B.-K. and Wang, K.-C.**  
444 (2014). Secondary neurulation of human embryos: morphological changes and the expression  
445 of neuronal antigens. *Child's Nervous System* **30**, 73-82.
- 446 **Yang, H.-J., Wang, K.-C., Chi, J. G., Lee, M.-S., Lee, Y.-J., Kim, S.-K. and Cho, B.-K.** (2003). Neural  
447 differentiation of caudal cell mass (secondary neurulation) in chick embryos: Hamburger and  
448 Hamilton Stages 16–45. *Developmental brain research* **142**, 31-36.

449

450

451

## Figures

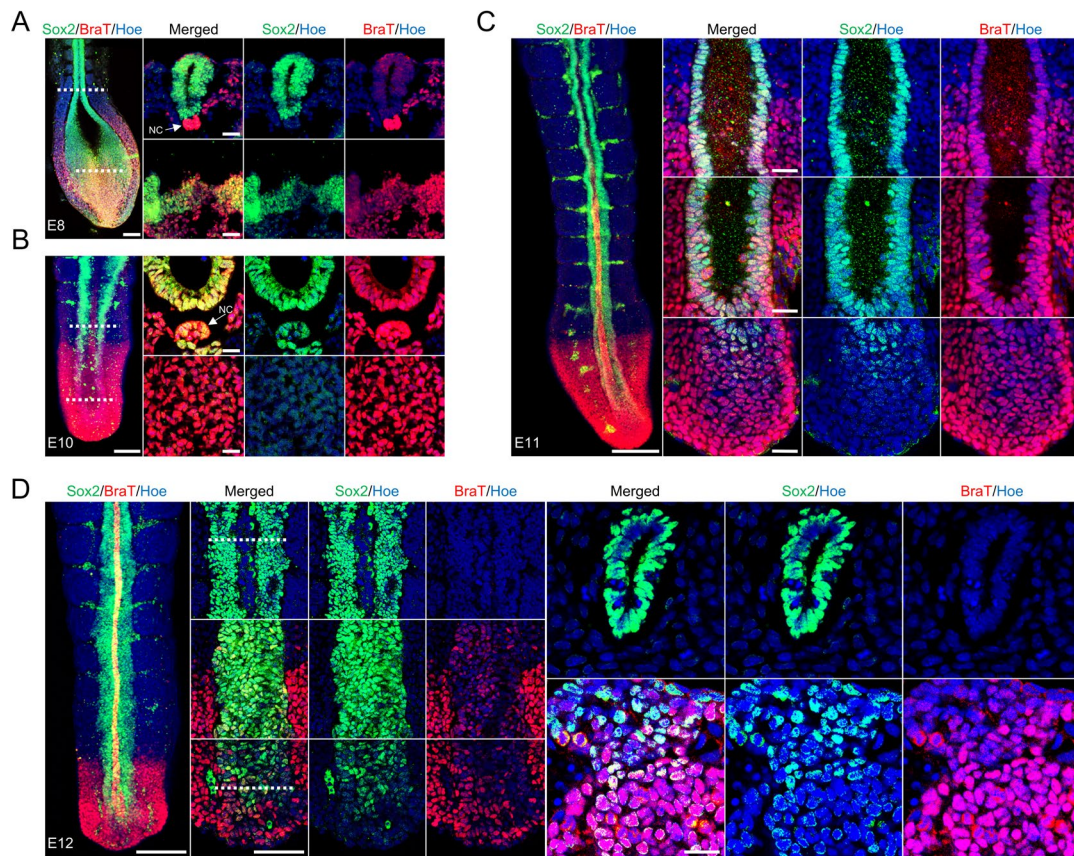

452

453 **Figure 1. Distribution of neuromesodermal progenitors during mouse neural tube**  
454 **formation and elongation.**

455 (A) Dorsal view of whole-mount imaging of E8 caudal neural tube immunostained for Sox2  
456 (Green) and BraT (Red); dotted lines indicate the level of sectioned images. The right panel  
457 depicts a transverse section of E8 mouse spinal neural tube during the convergent extension  
458 and neural tube formation phases; sections were stained for Sox2 (Green) and BraT (Red). All  
459 sections were counterstained with Hoechst 33342 (Blue). Scale bar = 100  $\mu$ m, scale bar of  
460 sectioned images = 40  $\mu$ m. NC is notochord, white arrow shows the notochord.

461 (B) Dorsal view of E10 whole-mount imaging of a caudal neural tube immunostained for Sox2  
462 (Green) and BraT (Red); dotted lines indicate the level of sectioned images. The right panel  
463 depicts a transverse section of E10 caudal spinal cord at tail-bud and neural tube levels, stained  
464 for Sox2 (Green) and BraT (Red). All sections were counterstained with Hoechst 33342 (Blue).  
465 Scale bar = 100  $\mu$ m, scale bar of sectioned images = 20  $\mu$ m. NC is notochord, white arrow  
466 shows the notochord.



467 (C) Dorsal view of an E11 tail whole-mount immunostained for Sox2 (Green) and BraT (Red);  
468 the right images depict magnified caudal domains of the tail-bud, neural rosette, and elongating  
469 neural tube. All sections were counterstained with Hoechst 33342 (Blue). Scale bar = 100  $\mu\text{m}$ ,  
470 scale bar of magnified images = 20  $\mu\text{m}$ .

471 (D) Dorsal view of whole-mount imaging of an E12 tail immunostained for Sox2 (Green) and  
472 BraT (Red); the right images depict magnified caudal domains of tail-bud, neural rosette, and  
473 elongating neural tube; dotted lines indicate the level of sectioned images. The right panel  
474 depicts the images of a transverse section at the tail-bud and caudal neural tube stained for  
475 Sox2 (Green) and BraT (Red). All sections were counterstained with Hoechst 33342 (Blue).  
476 Scale bar = 100  $\mu\text{m}$ , scale bar of magnified images = 50  $\mu\text{m}$ , scale bar of sectioned images =  
477 40  $\mu\text{m}$ .

478

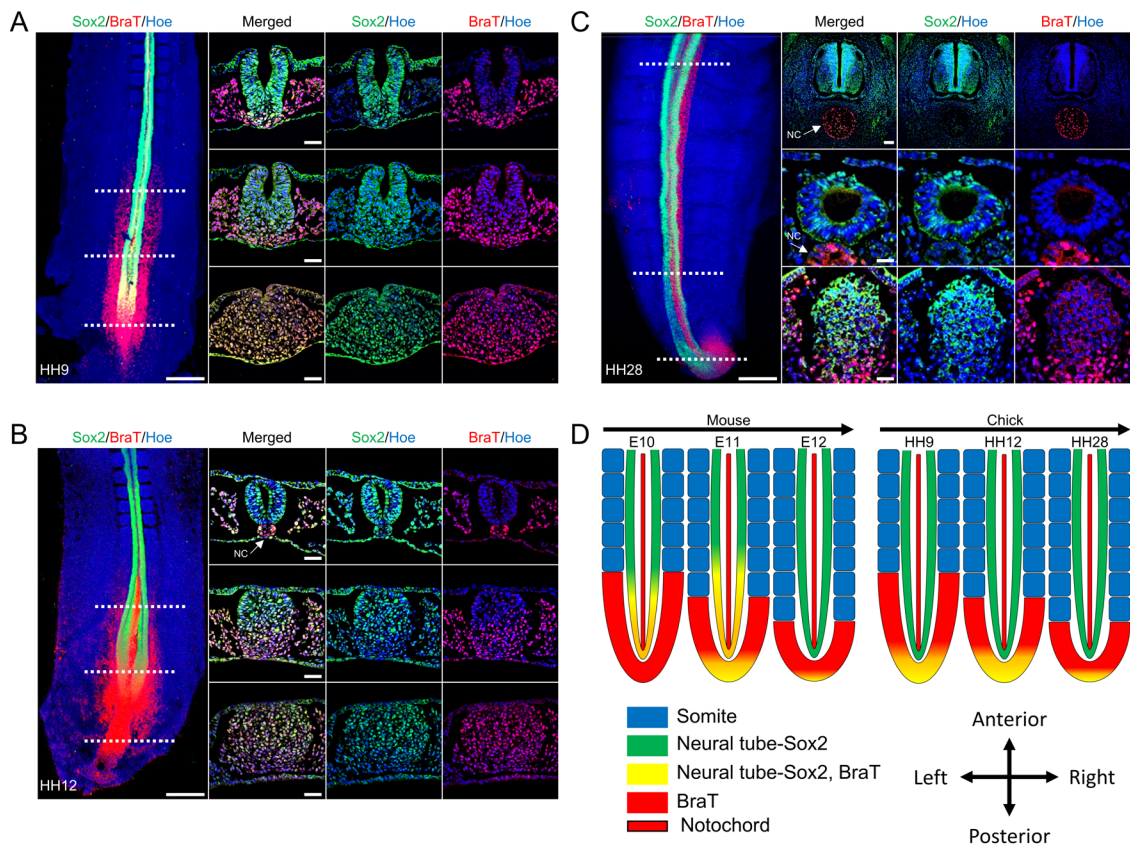

479

480 **Figure 2. Spatiotemporal expression of neuromesodermal progenitors during chick**  
 481 **neural tube formation and elongation.**

482 (A) Dorsal view of whole-mount imaging of an HH9 caudal neural tube; dotted lines indicate  
 483 the level of transverse sectioned images at the tail-bud, neural folding, and elevation and  
 484 bending levels. All sections were immunostained for Sox2 (Green) and BraT (Red) and  
 485 counterstained with Hoechst 33342 (Blue). Scale bar = 100  $\mu$ m, scale bar of sectioned images  
 486 = 30  $\mu$ m.

487 (B) Dorsal view of whole-mount imaging of an HH12 caudal neural tube; dotted lines indicate  
 488 the level of sectioned images at tail-bud, neural rosette, and neural tube level. All sections were  
 489 immunostained for Sox2 (Green) and BraT (Red) and counterstained with Hoechst 33342  
 490 (Blue). Scale bar = 100  $\mu$ m, scale bar of sectioned images = 30  $\mu$ m. NC is notochord, white  
 491 arrow shows the notochord.

492 (C) Dorsal view of whole-mount imaging of an HH28 caudal spinal cord; dotted lines indicate  
 493 the transverse images of the right panel. All sections were immunostained for Sox2 (Green)  
 494 and BraT (Red) and counterstained with Hoechst 33342 (blue). Scale bar = 100  $\mu$ m, scale bar

495 of sectioned images = 30  $\mu\text{m}$ , scale bar of magnified sectioned images = 70  $\mu\text{m}$ . NC is  
496 notochord, white arrow shows the notochord.

497 (D) Schematic diagram summarizes the spatiotemporal distribution of NMPs during the phases  
498 of neurulation and axial elongation in both the mouse and chick.

499

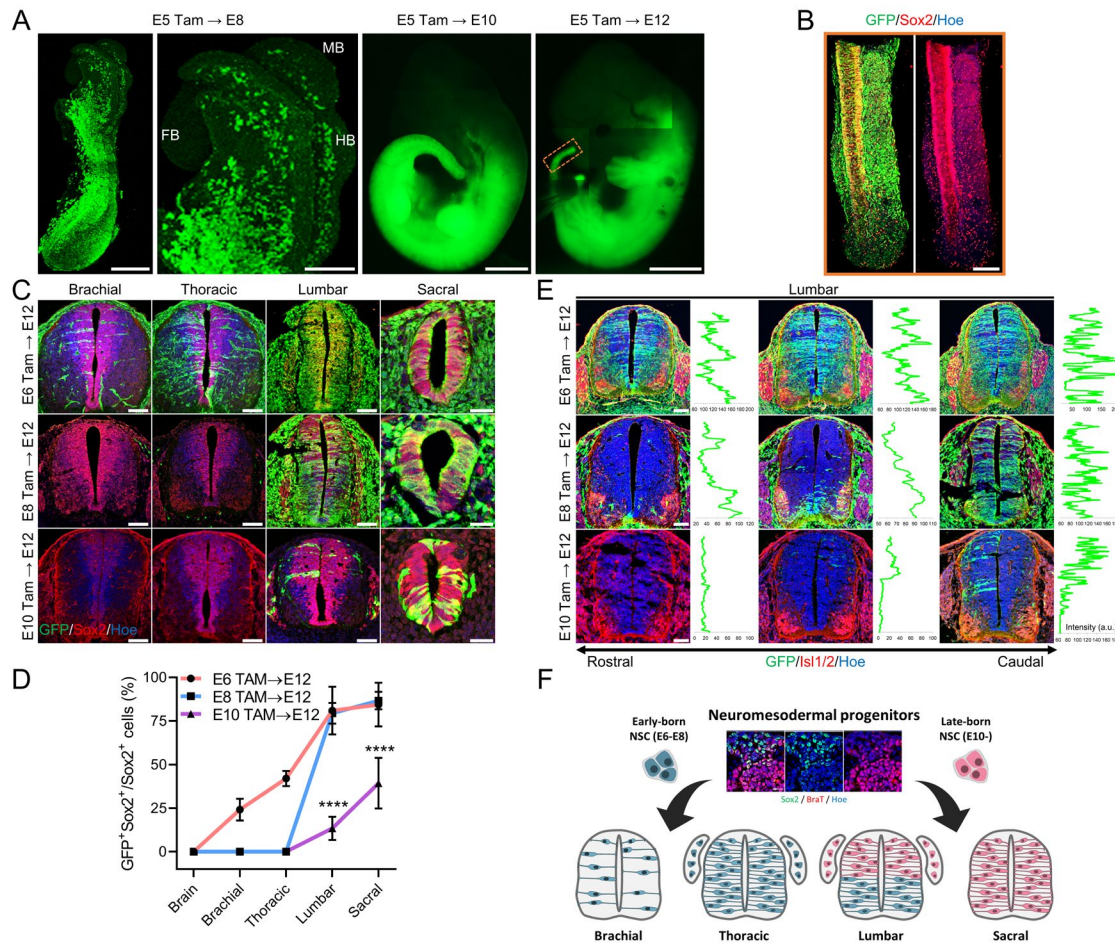

500

501

502 **Figure 3. Contribution of neuromesodermal progenitors to the formation of the**  
 503 **embryonic central nervous system.**

504 (A) Lateral view of E8 mouse embryos treated with tamoxifen at E5 and immunostained for  
 505 GFP (Green); stained tissue is 3D-imaged using a Leica microscope. E10 and E12 embryos  
 506 treated with tamoxifen at E5 were imaged by Evos fluorescent microscopy, showing the  
 507 endogenous expression of GFP immediately after dissection. The orange rectangular box  
 508 indicates the level of staining in (B). Scale bar = 100  $\mu$ m, scale bar of E8 magnified anterior  
 509 domain = 160  $\mu$ m, scale bar of whole embryos = 2 mm.

510 (B) Lateral-dorsal view of whole-mount E12 tail tissue treated with tamoxifen at E5 and  
 511 immunostained for Sox2 (Green) and BraT (Red) and counterstained with Hoechst 33342  
 512 (Blue). Scale bar = 100  $\mu$ m.

513 (C) Detection of GFP<sup>+</sup> cells in the pool of neural progenitors of sectioned embryonic spinal  
 514 cords derived from three groups of E12 embryos., where first, second, and third groups of  
 515 embryos treated with tamoxifen at E6, E8, and E10, respectively. Transversely sectioned  
 516 brachial, thoracic, lumbar, and sacral tissues were immunostained for Sox2 (Green) and BraT

517 (Red) and counterstained with Hoechst 33342 (Blue). Scale bar = 70  $\mu\text{m}$ , scale bar of sacral  
518 images = 30  $\mu\text{m}$ .

519 (D) Quantification of GFP and Sox2 double positive cells among Sox2<sup>+</sup> cells in E6 to E12, E8  
520 to E12, and E10 to E12 tamoxifen-treated embryos depicted in (C). Data are presented as mean  
521  $\pm$  standard deviation. \*\*\*\* P<0.0001 One Way ANOVA.

522 (E) Transverse section along the rostrocaudal axis of the lumbar region only, immunostained  
523 for Sox2 (Green) and Isl1/2 (Red) and counterstained with Hoechst 33342 (Blue). Intensity  
524 images depict the dorsal-ventral distribution of GFP within the ventricle of the lumbar neural  
525 tube. Scale bar = 70  $\mu\text{m}$ .

526 (F) Schematic diagram illustrating the distribution of GFP<sup>+</sup> cells derived from NMPs at E6, E8,  
527 and E10 along the rostrocaudal level of the lumbar domain. E6 and E8 GFP<sup>+</sup> cells contribute  
528 to the brachial, thoracic, and ventral domain at lumbar level; E10 GFP<sup>+</sup> cells preferentially  
529 generate dorsal, lumbar, and sacral domains.

530

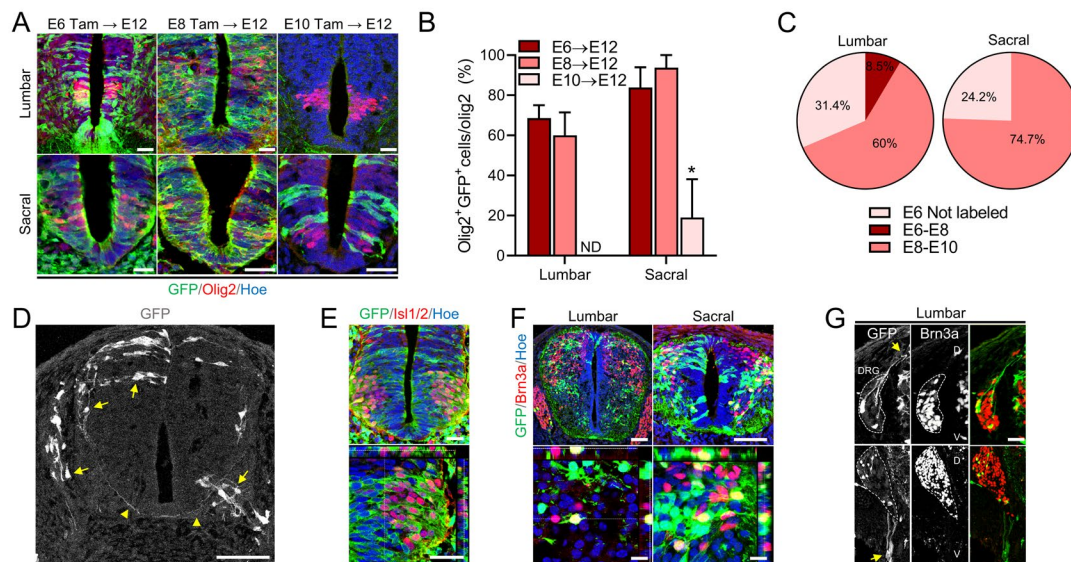

531

532 **Figure 4. Identification of the progeny of motoneurons and sensory neurons derived from**  
533 **neuromesodermal progenitors**

534 (A) Transverse sections through the lumbar and sacral levels of TCreER:Rosa-EGFP embryos  
535 treated with tamoxifen independently at E6, E8, and E10 and sacrificed at E12. Sections are  
536 immunostained for Olig2 (Red) and GFP (Green) and counterstained with Hoechst 33342  
537 (Blue). Scale bar = 30 μm.

538 (B) Quantification of GFP<sup>+</sup> cells expressing Olig2 among the total number of Olig2<sup>+</sup> cells in  
539 lumbar and sacral tissues that are shown in panel (A). Data are presented as mean ± standard  
540 deviation. \* P<0.05 One Way ANOVA.

541 (C) Pie chart showing the proportion of GFP<sup>+</sup> cells expressing Olig2 that are born in E8 and  
542 E10 in the lumbar and sacral spinal cord. The proportion is calculated by subtracting the  
543 percentages of GFP<sup>+</sup> and Olig2<sup>+</sup> cells labeled at E6 from those labeled at E8, and by subtracting  
544 the percentages of GFP<sup>+</sup> and Olig2<sup>+</sup> cells labeled at E8 from those labeled at E10. All embryos  
545 were examined at E12. Proportion of GFP<sup>-</sup> cells expressing Olig2<sup>+</sup> are considered not labeled.

546 (D) Lumbar neural tube treated with tamoxifen at E10 and sacrificed at E12; the white color  
547 highlights the distribution of GFP<sup>+</sup> cells. The yellow arrows point to the sensory neurons within

548 the dorsal and DRG domains, while the ventral arrow points to the MNs within the motor  
549 column. Arrow heads point to the pre-crossing and post-crossing axons of the commissural  
550 neurons. Scale bar = 100  $\mu\text{m}$ .

551 (E) Transverse section through the lumbar level of a TCreER:Rosa-EGFP embryo treated with  
552 tamoxifen at E8 and sacrificed at E12 and immunostained for Isl1/2 (Red) and GFP (Green);  
553 the bottom panel is an orthogonal optical section. The section was counterstained with Hoechst  
554 33342 (Blue). Scale bar = 30  $\mu\text{m}$ .

555 (F) Lumbar and sacral cross-sections treated with tamoxifen at E10 and harvested at E14.  
556 Sections are immunostained for Brn3a (Red) and GFP (Green) and counterstained with  
557 Hoechst 33342 (Blue). The bottom panel is a magnified orthogonal optical section. Scale bar  
558 = 70  $\mu\text{m}$ , scale bar of orthogonal images = 20  $\mu\text{m}$ .

559 (G) Magnified images of the lumbar DRG of embryos treated with tamoxifen at E10 and  
560 sacrificed at E12 (top panel) and E14 (bottom panel). Arrowheads point to the nerve fiber  
561 innervation to the dorsal spinal cord at E12 and the ventral innervation of peripheral nerve  
562 fibers at E14. Dotted lines mark the morphology of the DRG. D represents dorsal. V represents  
563 ventral. All sections were stained for GFP (Green) and Brn3a (Red). Scale bar = 50  $\mu\text{m}$ .

564

## Supplementary Figure

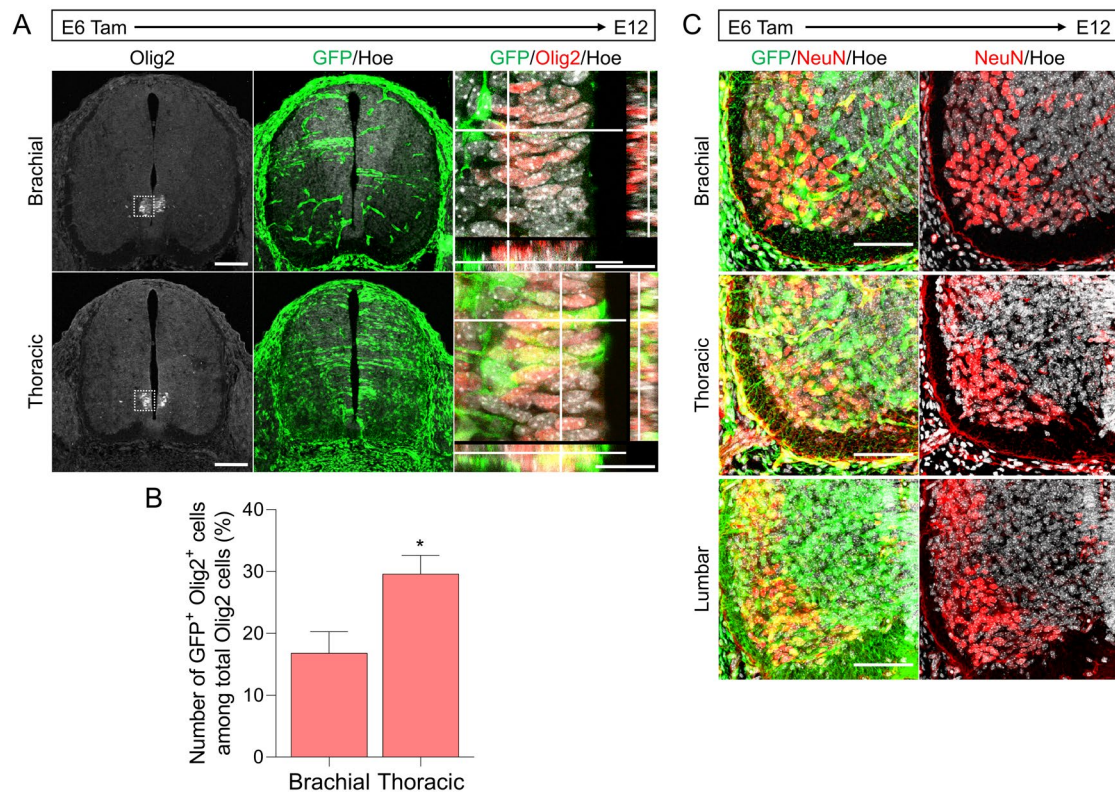

565

566 **Figure S1. Distribution of the progeny of progenitors and mature motoneurons derived**  
567 **from neuromesodermal progenitors.**

568 (A) Transverse sections through the brachial and thoracic levels of TCreER:Rosa-EGFP  
569 embryos treated with tamoxifen at E6 and sacrificed at E12. Sections were immunostained for  
570 Olig2 (Red) and GFP (Green) and counterstained with Hoechst 33342 (Grey). The right panel  
571 is a magnified orthogonal optical section. Scale bar = 30  $\mu$ m.

572 (B) Quantification of GFP<sup>+</sup> cells expressing Olig2 among the total number of Olig2<sup>+</sup> cells  
573 observed in the brachial and thoracic tissues that are depicted in panel (A). Data are presented  
574 as mean  $\pm$  standard deviation. \* P<0.01 Paired t-test.

575 (C) Transverse sections through the brachial, thoracic and lumbar levels of the embryonic  
576 spinal cord of a TCreER:Rosa-EGFP mouse treated with tamoxifen at E6 and sacrificed at E12.  
577 Sectioned tissues were immunostained for NeuN (Red) and GFP (Green) and counterstained  
578 with Hoechst 33342 (Grey). Scale bar = 30  $\mu$ m.
